# Supplementary material for: The Role of TSHR, PTEN and RASSF1A Promoters’ Methylation Status for Non-Invasive Detection of Papillary Thyroid Carcinoma
Source: MDPI journal article supplement (doi:10.3390/jcm11164917), 2022-08-21
Supplement: s1 [file s1]

Supplementary Table S1. Primers used for quantitative methylation-specific PCR.

| Gene Symbol    | DNA Strand | Primer ID | Primer Sequence (5'→3')                  | Amplicon Size, bp | Reference |
|----------------|------------|-----------|------------------------------------------|-------------------|-----------|
| <i>RASSF1A</i> | Antisense  | Fwd       | GCGTTGAAGTCGGGGTTC                       | 75                | [19]      |
|                |            | Rev       | CCCGTACTTCGCTAACTTTAAACG                 |                   |           |
|                |            | Probe     | FAM-ACAAACGCGAACCGAACGAAACCA-BHQ1        |                   |           |
| <i>PTEN</i>    | Sense      | Fwd       | GTTTCGCGTTGTTGTAAAAGTCG                  | 88                | [33]      |
|                |            | Rev       | CAATATAACTACCTAAAACCTTACTCGAACC          |                   |           |
|                |            | Probe     | FAM-TTCCCAACCGCCAACCTACAACCTACACTTA-BHQ1 |                   |           |
| <i>TSHR</i>    | Sense      | Fwd       | GGTGTAGAGTTGAGAATGAGGTGATTTC             | 122               | [34]      |
|                |            | Rev       | GCCCAAATCCCTAAACAAATCG                   |                   |           |
|                |            | Probe     | FAM-ACAACACCAACTACAACAAATCCGCCGA-BHQ1    |                   |           |
| <i>ACTB</i>    | Antisense  | Fwd       | TGGTGATGGAGGAGGTTTAGTAAGT                | 133               | [19]      |
|                |            | Rev       | AACCAATAAAACCTACTCCTCCCTTAA              |                   |           |
|                |            | Probe     | FAM-ACCACCACCCAACACACAATAACAAACACA-BHQ-1 |                   |           |
